# Supplementary material
Source: HighWire-hosted journal article supplement (https://www.cmajopen.ca/highwire/filestream/80853/field_highwire_adjunct_files/3/open-2015-0088-4-at.pdf)
Supplement: open-2015-0088-4-at.pdf [file open-2015-0088-4-at.pdf]

**Appendix 4 (as supplied by the authors): Incremental Cost Effectiveness Ratio (ICER) by Follow-up Time**

**Figure A4: Sensitivity Analysis Examining ICER by Follow-up Time, Mechanical Thrombectomy plus Intravenous Thrombolysis versus Intravenous Thrombolysis Alone**

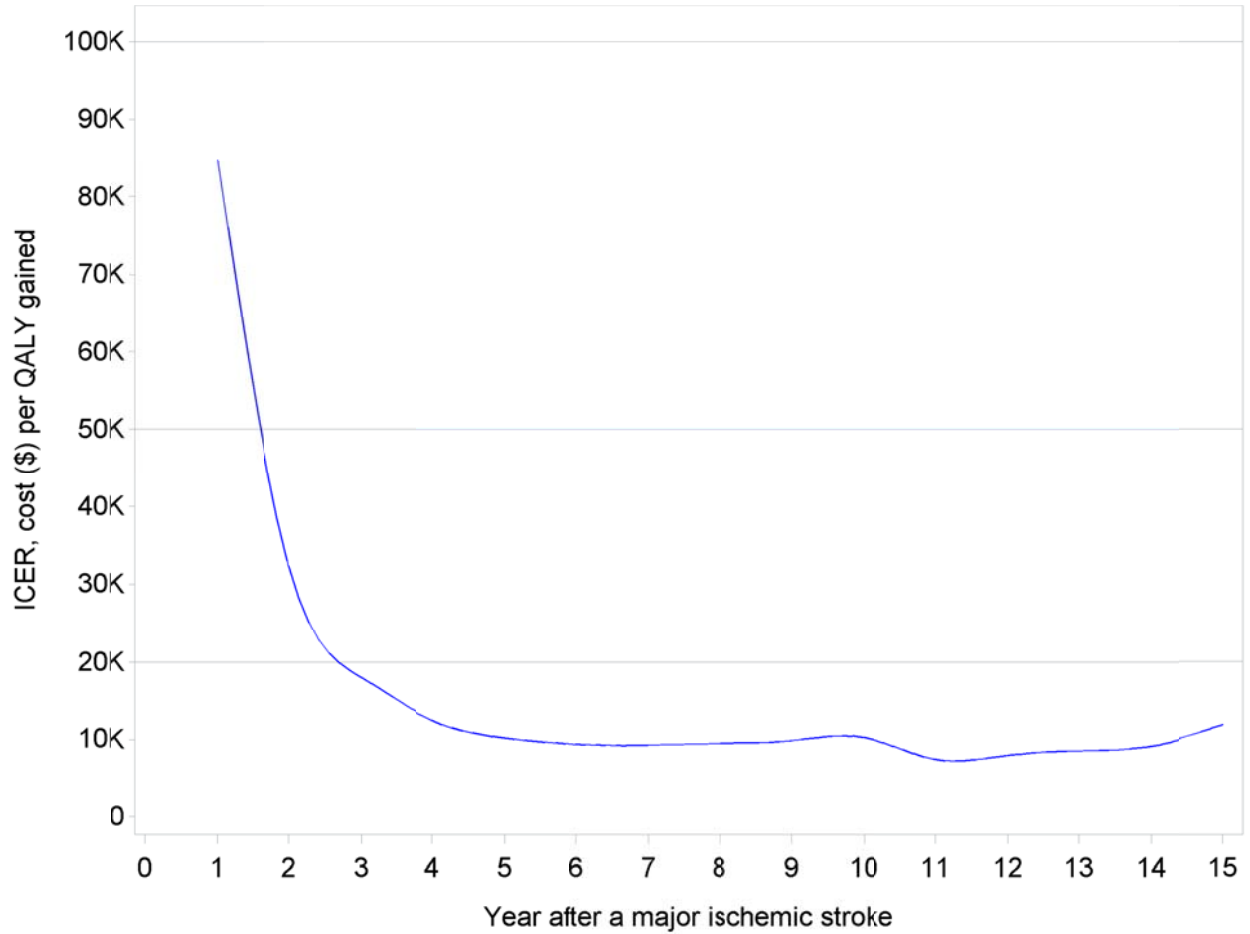

Appendix to: Xie X, Lambrinos A, Chan B, et al. Mechanical thrombectomy in patients with ischemic stroke: a cost-utility analysis. *CMAJ Open* 2016. DOI:10.9778/cmajo.20150088.
